# Supplementary material for: Characterization of the Human Blood Virome in Iranian Multiple Transfused Patients
Source: MDPI journal article supplement (doi:10.3390/v15071425), 2023-06-23
Supplement: s1 [file s1]

Contig size (bp)

7500  
5000  
2500  
0

1

Adenoviridae

Adintoviridae

Alphaflexiviridae

Anelloviridae

Astroviridae

Baculoviridae

Beijerinckvirinae

Betairidovirinae

Birnaviridae

Caliciviridae

Chrysoviridae

Cleopatravirinae

Corkvirinae

Deejayvirinae

Eekayvirinae

Endornaviridae

Ermolyevavirinae

Erskinevirinae

Eucampyvirinae

Finnlakeviridae

Firstpapillomavirinae

Flaviviridae

Fuselloviridae

Geminialphasatellitinae

Geminiviridae

Guernseyvirinae

Humphriesvirinae

Langleyhallvirinae

Luteoviridae

Mamaviridae

Mclavirinae

Melnykvirinae

Mitoviridae

Molineuxvirinae

Narnaviridae

Nclavirinae

Okabevirinae

Polymycoviridae

Polyomaviridae

Poxviridae

Redondoviridae

Reoviridae

Salasmaviridae

Sedoreovirinae

Slopekvirinae

Studiervirinae

Tectiviridae

Twarogvirinae

Twortvirinae

Virgaviridae
