# Supplementary material for: Characterization of the Human Blood Virome in Iranian Multiple Transfused Patients
Source: MDPI journal article supplement (doi:10.3390/v15071425), 2023-06-23
Supplement: s1 [file s1]

Frequency

30

20

10

0

PCL

PD

ZN

Pool ID

PCL

PD

ZN

Sample ID

PCL9  
PCL8  
PCL7  
PCL6  
PCL5  
PCL4  
PCL20  
PCL2  
PCL19  
PCL18  
PCL17  
PCL16  
PCL15  
PCL14  
PCL13  
PCL12  
PCL11  
PCL10  
PCL1

1000

2000

3000

PD-9  
PD-8  
PD-7  
PD-6  
PD-5  
PD-4  
PD-31  
PD-30  
PD-3  
PD-28  
PD-26  
PD-25  
PD-24  
PD-23  
PD-21  
PD-20  
PD-19  
PD-18  
PD-17  
PD-16  
PD-15  
PD-14  
PD-13  
PD-12  
PD-11  
PD-1

1000

2000

3000

ZN-9  
ZN-8  
ZN-5  
ZN-31  
ZN-30  
ZN-29  
ZN-27  
ZN-26  
ZN-25  
ZN-24  
ZN-23  
ZN-22  
ZN-21  
ZN-20  
ZN-18  
ZN-17  
ZN-14  
ZN-13  
ZN-11

1000

2000

3000

count\_log\_num

1.5

1.0

0.5

0.0

Contig size
