# Supplementary material for: Characterization of the Human Blood Virome in Iranian Multiple Transfused Patients
Source: Viruses. 2023 Jun 23;15(7):1425. doi: 10.3390/v15071425 (PMC10386462; doi:10.3390/v15071425)
Supplement: Supplementary file 1 [file viruses-15-01425-s001.zip]

Archive with 9 entries (9 files):
- Supplementary Figure S1.pdf
- Supplementary Figure S2.pdf
- Supplementary Figure S3.pdf
- Supplementary Figure S4.pdf
- Supplementary Figure S5.pdf
- Supplementary Figure S6.pdf
- Supplementary Figure S7.pdf
- Supplementary Table S1.xlsx
- Supplementary Table S2.xlsx
