# Supplementary material for: Characterization of the Human Blood Virome in Iranian Multiple Transfused Patients
Source: Viruses. 2023 Jun 23;15(7):1425. doi: 10.3390/v15071425 (PMC10386462; doi:10.3390/v15071425)
Supplement: Supplementary file 1 [file viruses-15-01425-s001.zip › Supplementary Table S1.xlsx]

## Sheet: Sheet1
	Healthy blood donors																				Haemodialysis
Family	PCL1	PCL10	PCL11	PCL12	PCL13	PCL14	PCL15	PCL16	PCL17	PCL18	PCL19	PCL2	PCL20	PCL3	PCL4	PCL5	PCL6	PCL7	PCL8	PCL9	PD-1	PD-10	PD-11	PD-12	PD-13	PD-14	PD-15	PD-16	PD-17	PD-18	PD-19	PD-2	PD-20	PD-21	PD-23	PD-24	PD-25	PD-26	PD-27	PD-28	PD-29	PD-3	PD-30	PD-31	PD-32	PD-4	PD-5	PD-6	PD-7
Adenoviridae	0	0	0	0	0	0	0	0	0	0	0	0	0	0	0	1.56492e-05	0	0	0	2.92998e-05	0	0	0	0	0	0	0	0	0	0	0	0	0	0	0	0	0	0	0	0	0	0	0	0	0	0	0	0	0
Anelloviridae	0.00206568	0.000309709	3.12275e-05	0.000490291	0.000611319	0.00123354	0.000942651	0.000344219	0.000797207	0.000960284	0.000154267	9.82964e-05	0.00104446	0	0.000362244	0.000855518	0.000222206	0.000172967	0.000285941	0.000835507	0.00125652	0	0.00308107	0.00529183	0.000281508	0.00695841	0.0058753	0.0347073	0.00209106	0.00210114	0.0536183	0.0018861	0.0432589	0.00245876	0.0626114	0.00694007	0.0160808	0.306289	0	0.0558031	0	0.0106827	0.167969	0.0555169	0	0.00280904	0.00745689	0.00807373	0.459705
Flaviviridae	0	0	0	0	0	0	0	0	0	0	0	0	0	0	0	0	0	0	0	0	0.00666829	0.00102161	0.00249652	0	0	0.000428551	0	0	0	0	0	0.0015238	0	0	0	0	0	0	0	0	0	0	0	0	0	0	0	0	0
Other families	0.000358551	2.299e-05	0.00103077	0.000709332	0.000874917	0.000777921	0.000805267	0.000811653	0.000715474	0.000557519	0.000476108	0.000855257	0.000770768	0.00113503	0.000536428	0.000743597	0.000717989	0.000619897	0.000518756	0.000690712	0.000929949	0	0.000215763	0	0.000102089	0	0.000471918	0.000895245	0.000466252	0.00118985	0.00160423	0.000856332	0.000269637	0	0.000220799	0	0.000702231	0	0	0	0	0.000248089	0	0	0	0.000938687	9.62138e-05	0.000627175	0.000143826
Papillomaviridae	0	0	0	0	0	0	0	0	0	0	0	0	0	0	0	0	0	0	0	0	0	0	0	0	0	0	0	0	0	0	0	0	0	0	0	0	0.000251857	0	0	0	0	0	0	0	0	0	0	0	0
Polyomaviridae	1.69823e-05	0	0	0	0	0	0	0	0	0	0	3.47228e-05	0	0	0	0	0	0	0	5.27245e-05	0	0	0.000223154	0	0	0	0	0	0.000194335	0	0	0	0	0	0	0	0	0	0	0	0	0	0	0	0	0	0	0	0
Poxviridae	0	0	0	0	0	0	0	0	0	0	0	0	0	0	0	0	0	0	0	0	0	0	0	0	0	0	0	0	0	0	0	0	0	0	0	0	0	0	0	0	0	0	0	0	0	0	0	0	0
Prokaryotic	0.0139525	0.0749677	0.0170641	0.0153115	0.0160687	0.0159347	0.0162242	0.0166734	0.0174695	0.0176895	0.0164553	0.0166962	0.0172672	0.0138237	0.0157974	0.0167454	0.0170726	0.0154555	0.0154539	0.0172684	0.0198189	0.0178169	0.0206278	0.0224024	0.00837099	0.0112557	0.00973807	0.0215223	0.0158076	0.0194631	0.0153225	0.0224154	0.019683	0.0265971	0.0352004	0.0224585	0.0230615	0.0108913	0.0220565	0.0175452	0	0.0147192	0.0243179	0.0204448	0	0.0179472	0.0202344	0.0194406	0.008301
Reoviridae	0	0	0	0	0	0	0	0	0	4.22405e-05	0	0	0	0	0	0	0	0	0	0	0	0	0	0	0	0	0	0	0	0	0	0	0	0	0	0	0	0	0	0	0	0	0	0	0	0	0	0	0
Retroviridae	0	0	0	0	0	0	0	0	1.56439e-05	0	0	0	0	0	0	0	0	0	0	0	0	0	0	0	0	0	0	0	0	0	0	0	0	0	0	0	0	0	0	0	0	0	0	0	0	0	0	0	0
[truncated: 29 more columns]
