# Supplementary material for: Characterization of the Human Blood Virome in Iranian Multiple Transfused Patients
Source: Viruses. 2023 Jun 23;15(7):1425. doi: 10.3390/v15071425 (PMC10386462; doi:10.3390/v15071425)
Supplement: Supplementary file 1 [file viruses-15-01425-s001.zip › Supplementary Table S2.xlsx]

## Sheet: reference_accession_numbers_ane
Accession number	Virus
NC_007014.1	Small anellovirus 2
NC_007013.1	Small anellovirus 1
NC_038361.1	Torque teno midi virus 14
NC_038360.1	Torque teno midi virus 13
NC_038359.1	Torque teno midi virus 12
NC_038358.1	Torque teno midi virus 11
NC_038357.1	Torque teno midi virus 10
NC_038356.1	Torque teno midi virus 9
NC_038355.1	Torque teno midi virus 8
NC_038354.1	Torque teno midi virus 7
NC_038353.1	Torque teno midi virus 6
NC_038352.1	Torque teno midi virus 5
NC_038362.1	Torque teno midi virus 15
NC_038351.1	Torque teno midi virus 4
NC_038350.1	Torque teno midi virus 3
NC_038347.1	Torque teno mini virus 12
NC_038346.1	Torque teno mini virus 11
NC_038345.1	Torque teno mini virus 10
NC_038344.1	Torque teno virus 29
NC_038343.1	Torque teno virus 24
NC_038342.1	Torque teno virus 23
NC_038341.1	Torque teno virus 21
NC_038340.1	Torque teno virus 20
NC_038339.1	Torque teno virus 13
NC_038338.1	Torque teno virus 11
NC_038336.1	Torque teno virus 5
NC_030297.1	Torque teno mini virus 18
NC_025727.1	Torque teno mini virus ALH8
NC_025726.1	Torque teno mini virus ALA22
NC_020498.1	TTV-like mini virus
NC_015783.1	Torque teno virus
NC_014097.1	Torque teno mini virus 1
NC_014096.1	Torque teno virus 15
NC_014095.1	Torque teno mini virus 6
NC_014094.1	Torque teno virus 6
NC_014093.1	Torque teno midi virus 2
NC_014091.1	Torque teno virus 16
NC_014090.1	Torque teno mini virus 4
NC_014089.1	Torque teno mini virus 5
NC_014088.1	Torque teno mini virus 3
NC_014086.1	Torque teno mini virus 2
NC_014084.1	Torque teno virus 8
NC_014083.1	Torque teno virus 25
NC_014082.1	Torque teno mini virus 7
NC_014081.1	Torque teno virus 3
NC_014080.1	Torque teno virus 7
NC_014079.1	Torque teno virus 26
NC_014078.1	Torque teno virus 19
NC_014077.1	Torque teno virus 14
NC_014069.1	Torque teno virus 4
NC_014076.1	Torque teno virus 10
NC_014075.1	Torque teno virus 12
NC_014074.1	Torque teno virus 27
NC_014068.1	Torque teno mini virus 8
NC_014073.1	Torque teno virus 28
NC_009225.1	Torque teno midi virus 1
NC_002195.1	Torque teno mini virus 9
