# Supplementary figures and images for: Characterization of the Human Blood Virome in Iranian Multiple Transfused Patients
Source: MDPI journal article supplement (doi:10.3390/v15071425), 2023-06-23

**a**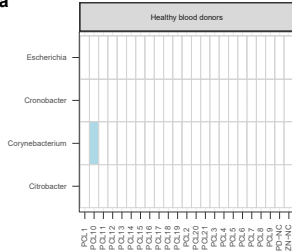**b**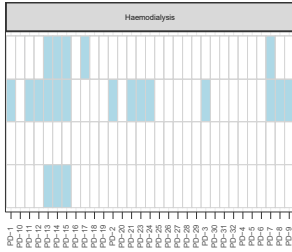**c**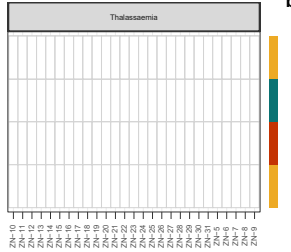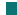

Environmental pathogen (Food, urinary tract...)

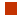

Skin and respiratory tract

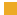

Gut

0

5

10

Supplement: s1 [file s1]

Animal Incl. Animal Other

Viral family

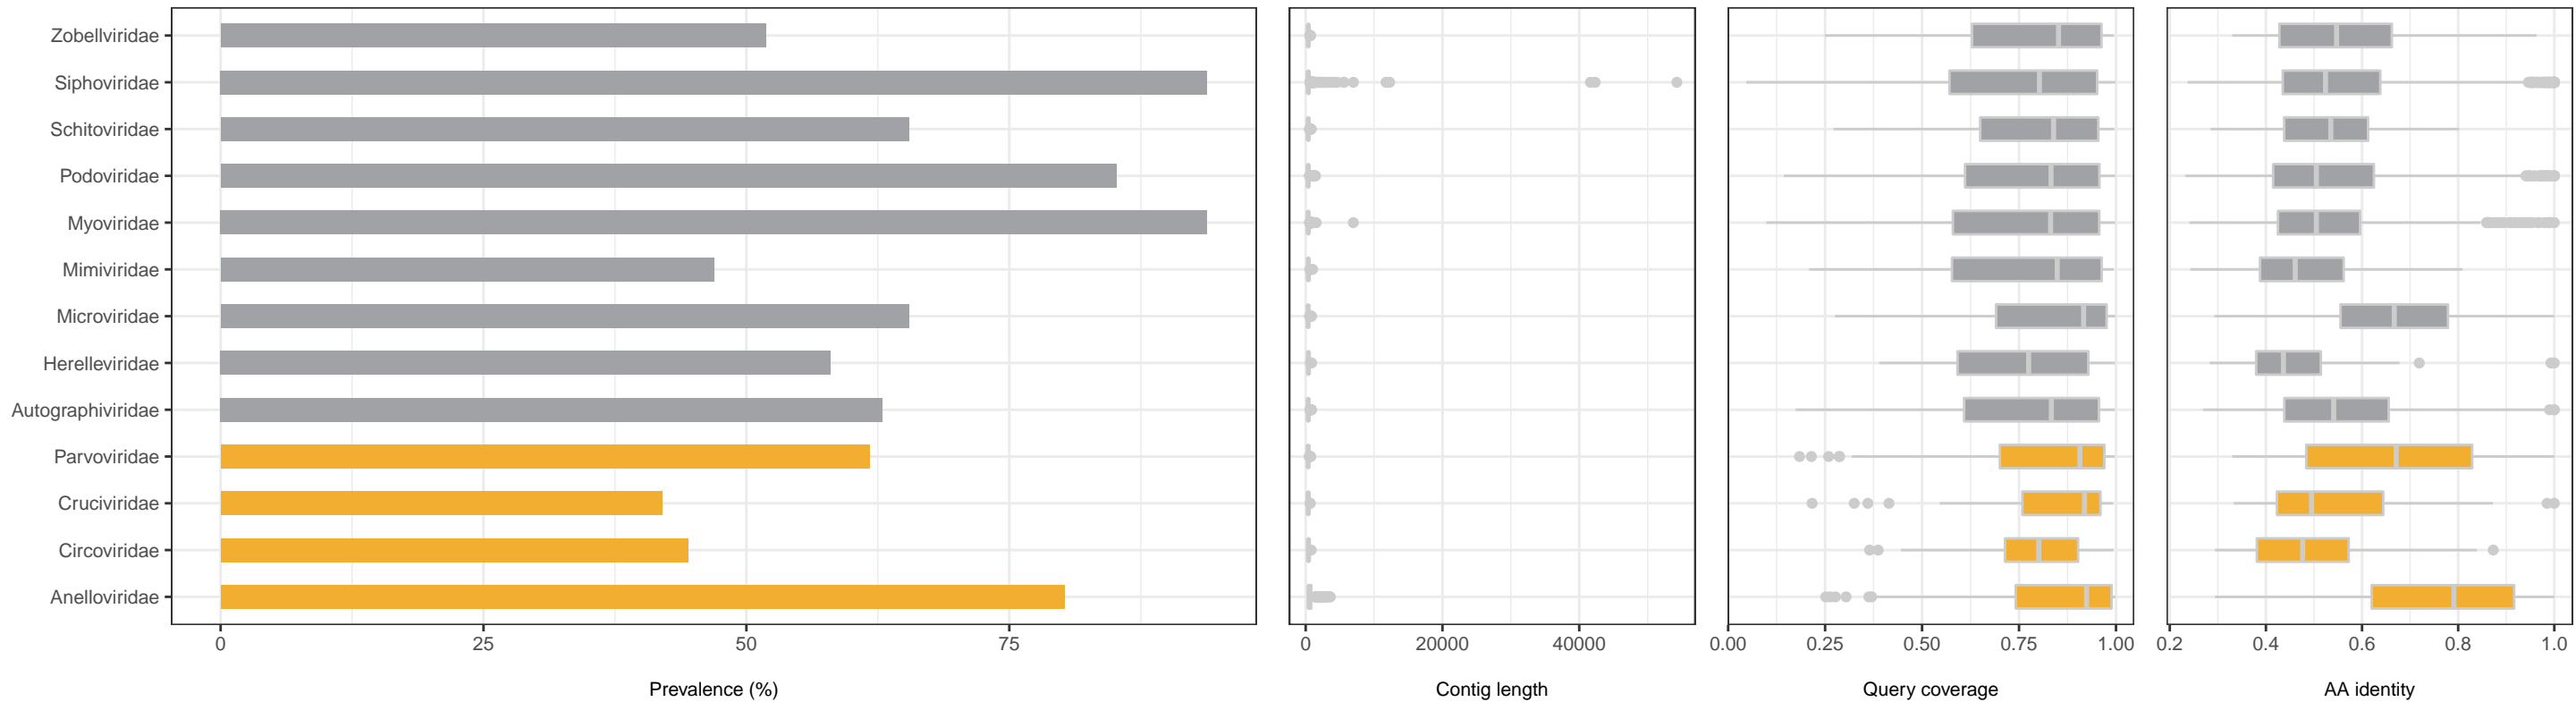

Supplement: s1 [file s1]

Animal Incl. Animal Other

Viral family

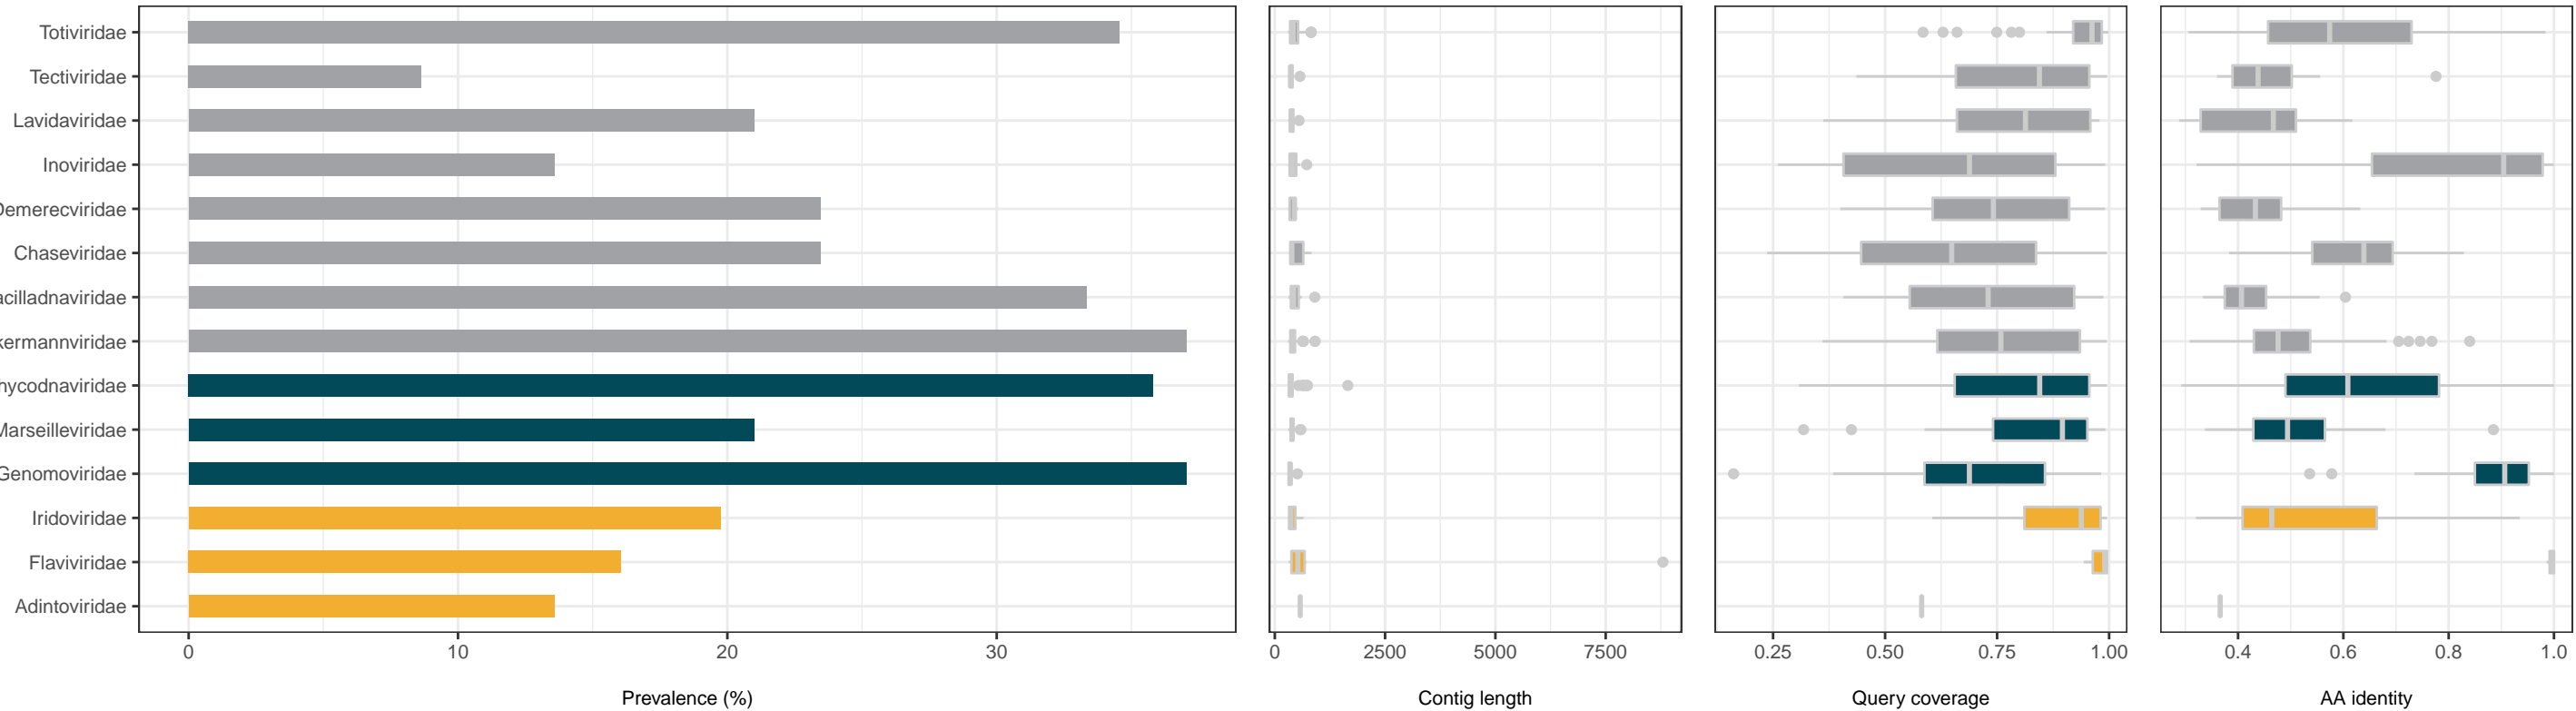

Supplement: s1 [file s1]

Animal Incl. Animal Other

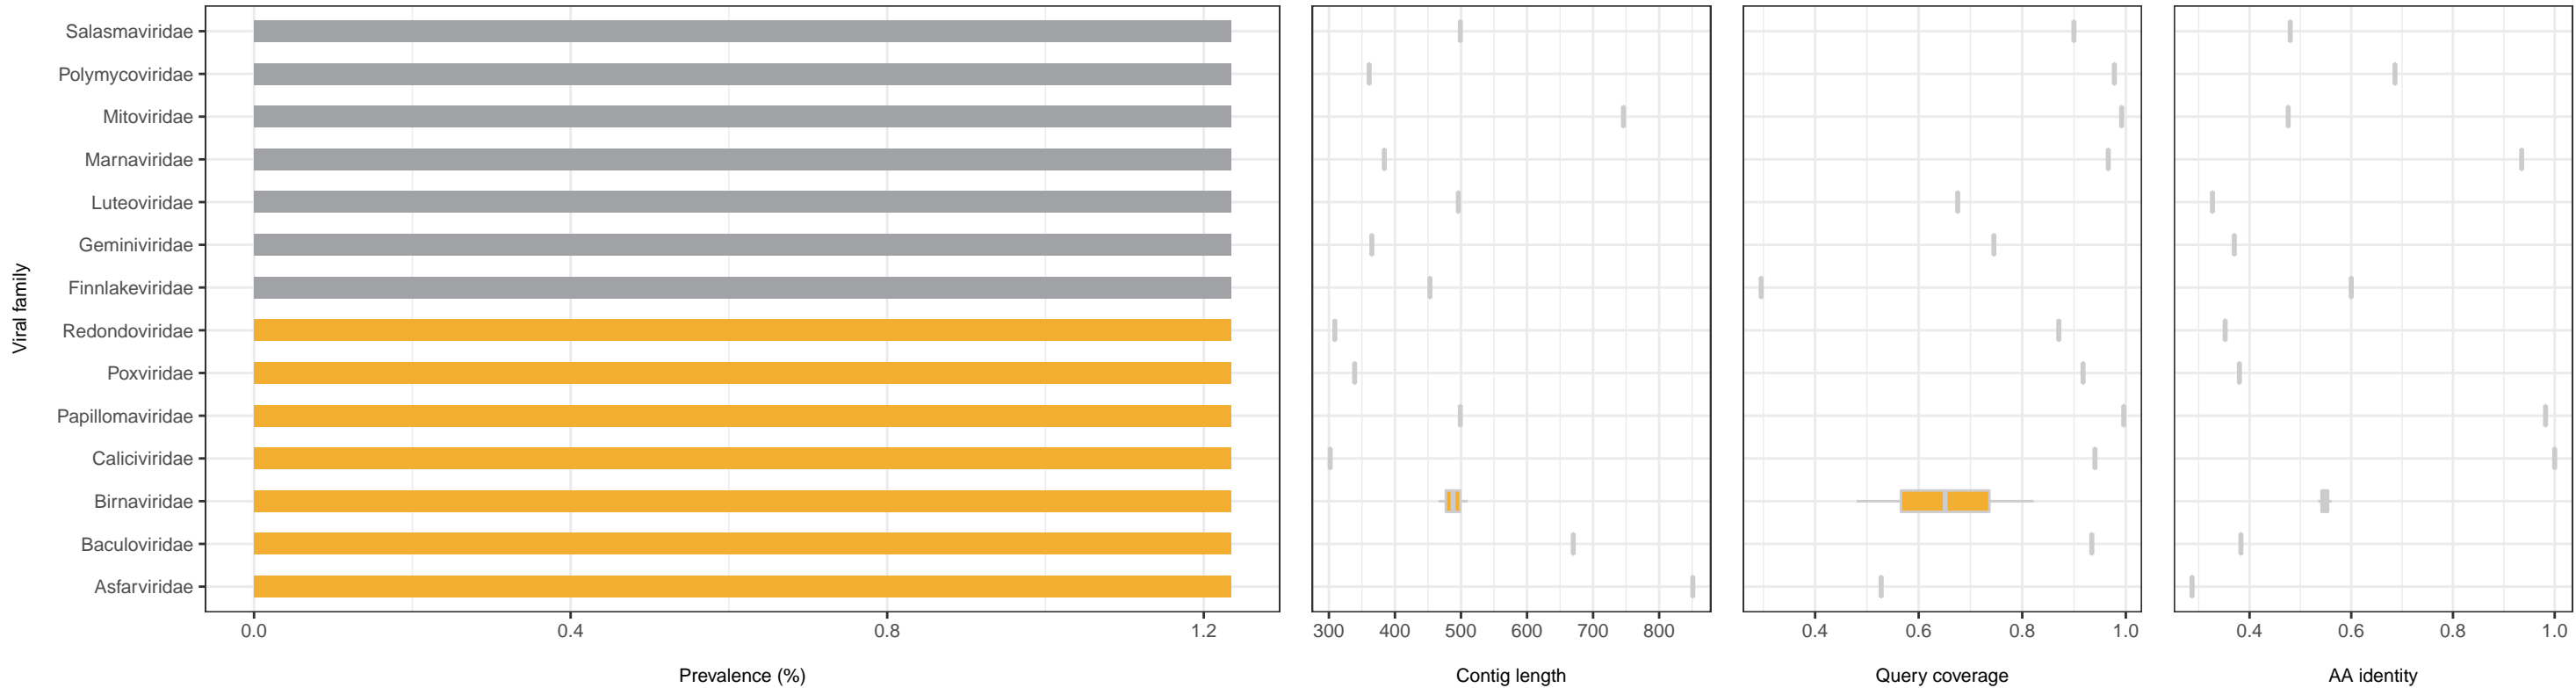

Supplement: s1 [file s1]

Animal Incl. Animal Other

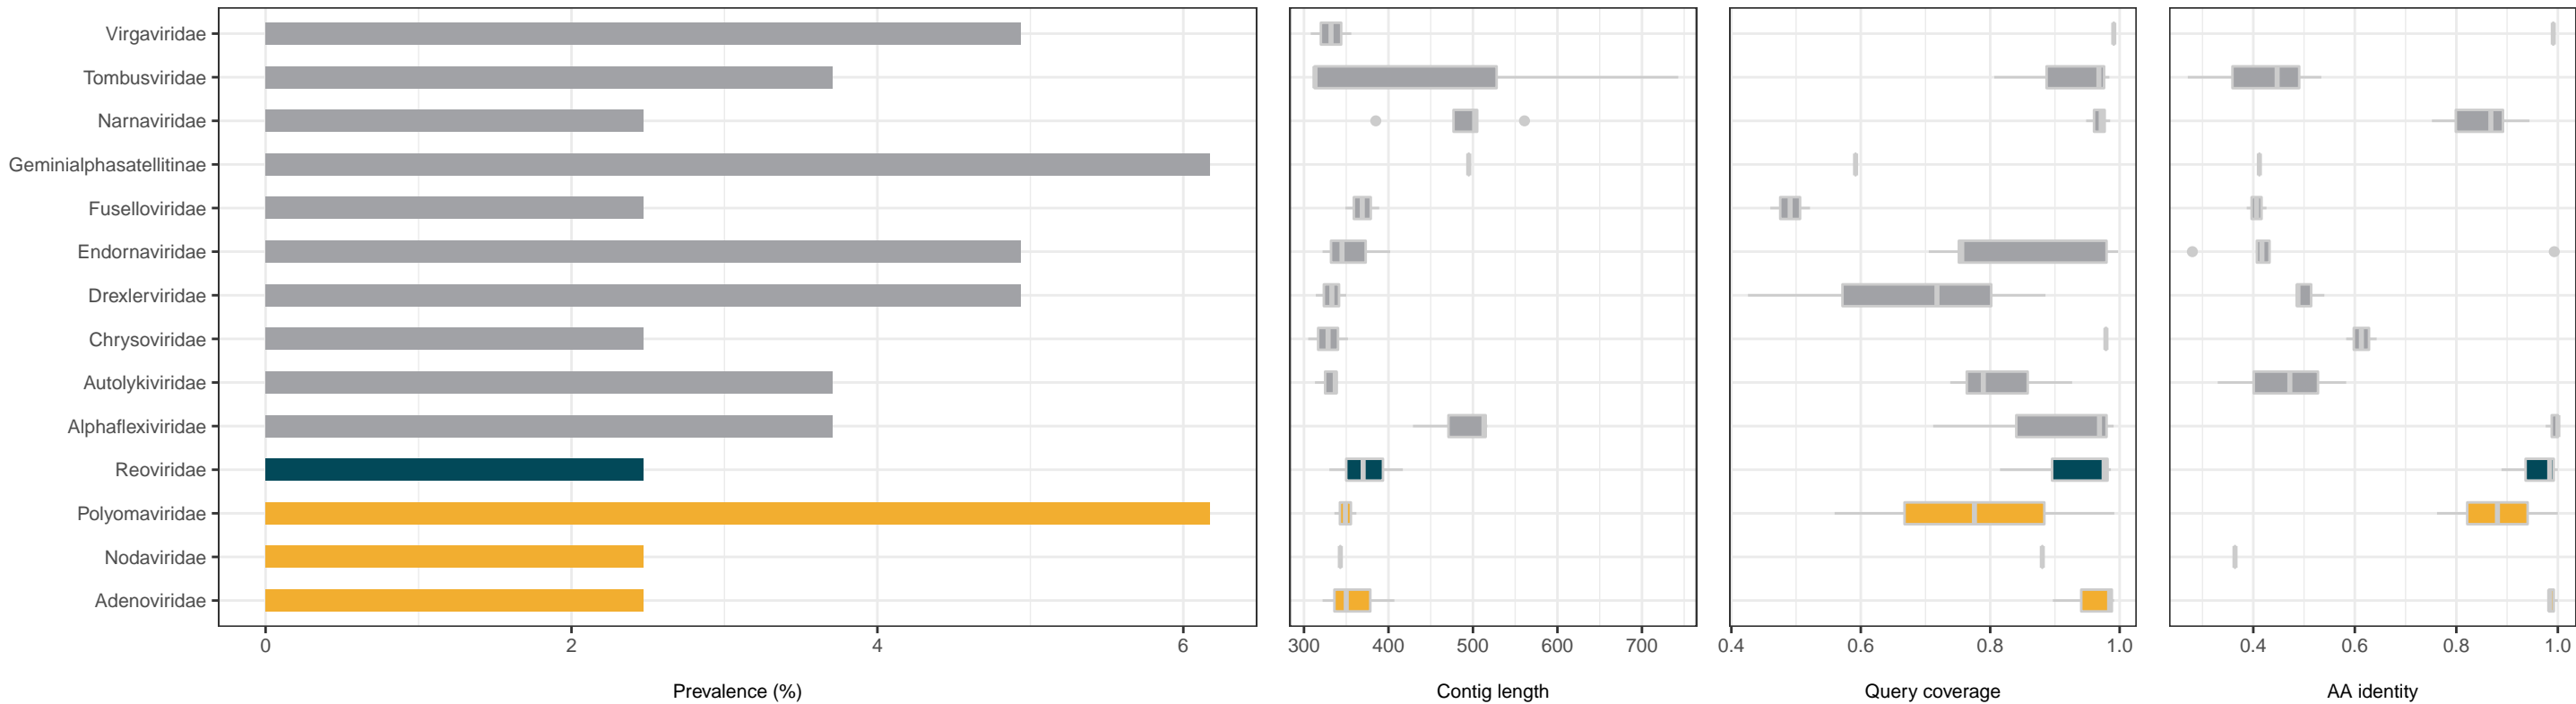

Supplement: s1 [file s1]
